# Supplementary material for: 8,9-Dihydrocannabidiol, an Alternative of Cannabidiol, Its Preparation, Antibacterial and Antioxidant Ability
Source: MDPI journal article supplement (doi:10.3390/molecules28010445), 2023-01-03
Supplement: s1 [file s1]

### 8,9-Dihydrocannabidiol, an alternative of cannabidiol, its preparation, antibacterial and antioxidant ability

Qi Wu<sup>1,2</sup>, Mao-yue Guo<sup>2</sup>, Liang-hua Zou<sup>3</sup>, Qi-qi Wang<sup>2</sup> and Yong-mei Xia<sup>1,2\*</sup>

<sup>a</sup> *State Key Laboratory of Food Science and Technology, Jiangnan University, Wuxi, Jiangsu 214122, China*

<sup>b</sup> *School of Chemical and Material Engineering, Jiangnan University, Wuxi, Jiangsu 214122, China*

<sup>c</sup> *School of Life Science and Health Engineering, Jiangnan University, Wuxi, Jiangsu 214122, China*

#### Caption list

**Figure S1.** <sup>1</sup>H NMR(400 MHz, CDCl<sub>3</sub>) and <sup>13</sup>C NMR(126 MHz, CDCl<sub>3</sub>) and MS spectra of 8,9-dihydrocannabidiol (H<sub>2</sub>CBD)

**Figure S2.** <sup>1</sup>H NMR(400 MHz, CDCl<sub>3</sub>) and <sup>13</sup>C NMR(126 MHz, CDCl<sub>3</sub>) and MS spectra of 6,6,8,9-tetrahydrocannabinol (6,6,8,9-THC)

**Figure S3.** <sup>1</sup>H NMR(400 MHz, CDCl<sub>3</sub>) and <sup>13</sup>C NMR(126 MHz, CDCl<sub>3</sub>) and MS spectra of 2'-Isopropyl-4,5'-dimethyl-1',2'-dihydro-3',4'-tetrahydro-[1,1'-biphenyl]-2,6-diol (1a)

**Figure S4.** <sup>1</sup>H NMR(400 MHz, CDCl<sub>3</sub>) and <sup>13</sup>C NMR(126 MHz, CDCl<sub>3</sub>) and MS spectra of 2'-Isopropyl-4,5'-dimethyl-1',2'-dihydro-3',4',6'-hexahydro-1',2-methoxybenzo[b]oxacyclooctatrien-6-ol (1b)

**Figure S5.** <sup>1</sup>H NMR(400 MHz, CDCl<sub>3</sub>) and <sup>13</sup>C NMR(126 MHz, CDCl<sub>3</sub>) and MS spectra of 2'-Isopropyl-5'-methyl-1',2'-dihydro-3',4'-tetrahydro-[1,1'-biphenyl]-2,6-diol (2a)

**Figure S6.** <sup>1</sup>H NMR(400 MHz, CDCl<sub>3</sub>) and <sup>13</sup>C NMR(126 MHz, CDCl<sub>3</sub>) and MS spectra of 2'-Isopropyl-5'-methyl-1',2'-dihydro-3',4',6'-hexahydro-1',2-methoxybenzo[b]oxacyclooctatrien-6-ol (2b)

**Figure S7.** <sup>1</sup>H NMR(400 MHz, CDCl<sub>3</sub>) and <sup>13</sup>C NMR(126 MHz, CDCl<sub>3</sub>) and MS spectra of 2'-Isopropyl-5'-methyl-1',2'-dihydro-3',4'-tetrahydrocyclohexyl-6-en-1-yl)naphthalene-2-ol (3a)

**Figure S8.** <sup>1</sup>H NMR(400 MHz, CDCl<sub>3</sub>) and <sup>13</sup>C NMR(126 MHz, CDCl<sub>3</sub>) and MS spectra of 2'-Isopropyl-5'-methyl-1',2'-dihydro-3',4',6'-hexahydro-1,7'-methylnonaphthalene[2,1-b]oxoxine (3b)

**Figure S9.** <sup>1</sup>H NMR(400 MHz, CDCl<sub>3</sub>) and <sup>13</sup>C NMR(126 MHz, CDCl<sub>3</sub>) and MS spectra of 2'-Isopropyl-5'-methyl-1',2'-dihydro-3',4'-tetrahydro-[1,1'-biphenyl]-2,4,6-triol (4)

**<sup>1</sup>H NMR, <sup>13</sup>C NMR and MS Data**

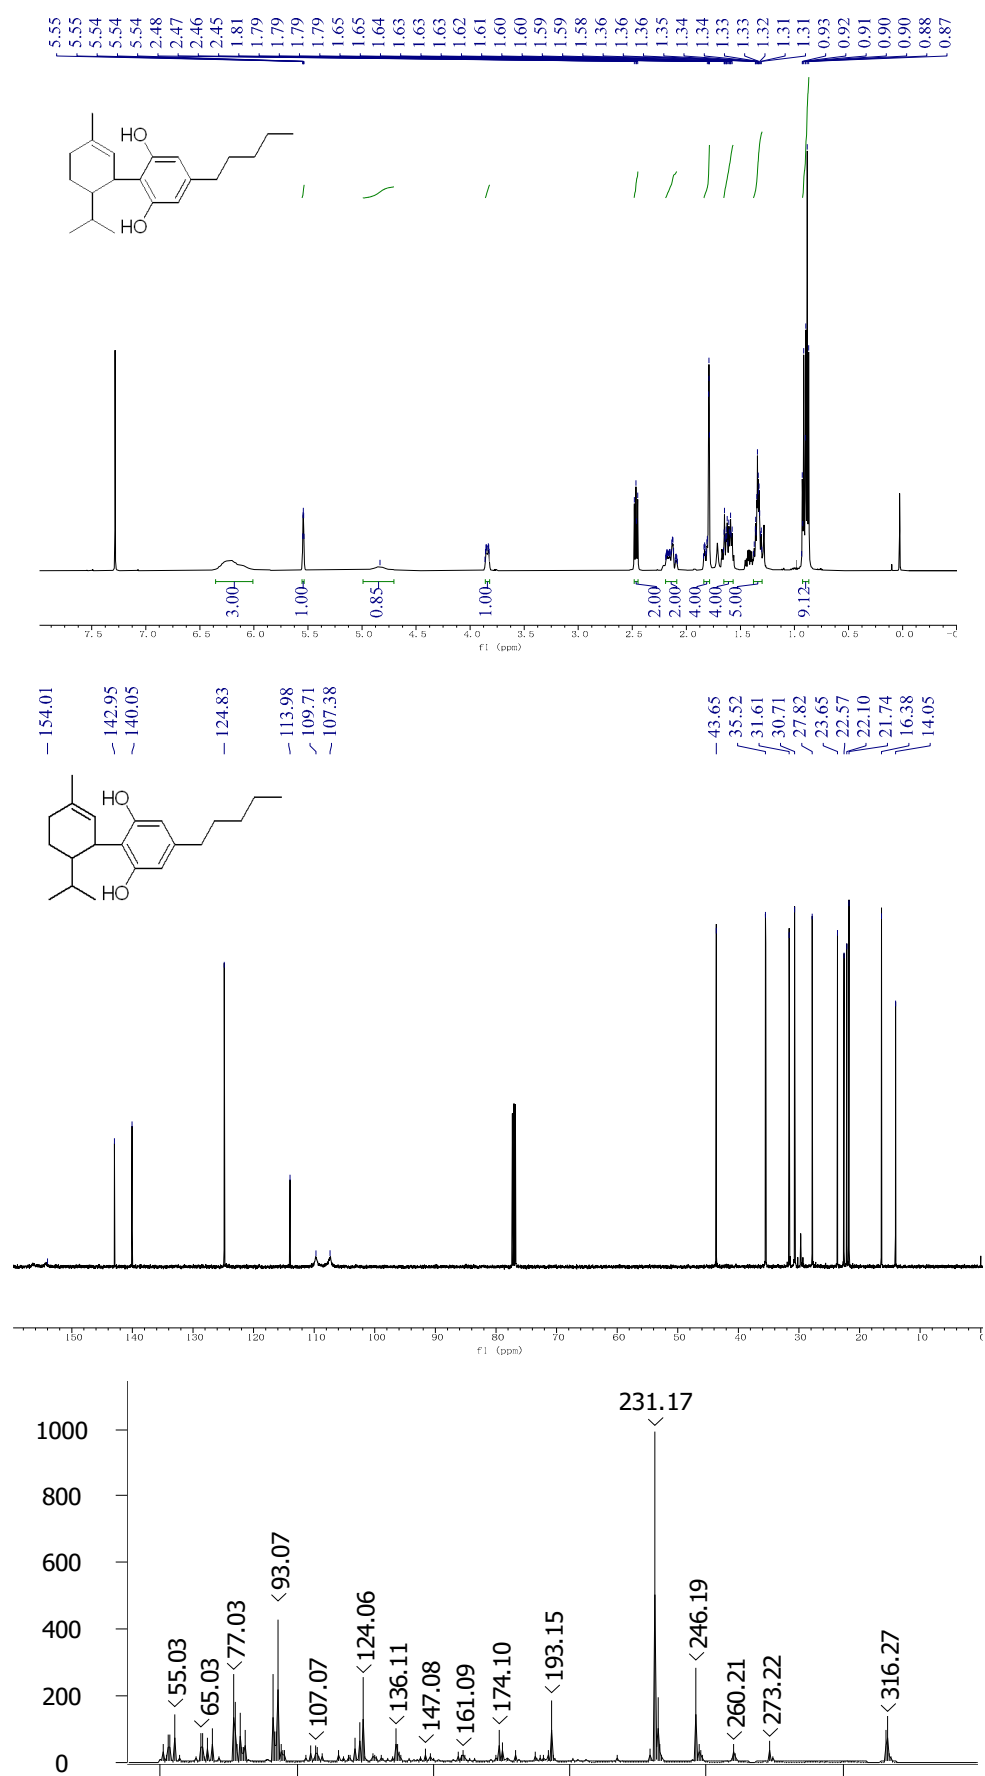

**Figure S1.**  $^1\text{H}$  NMR(400 MHz,  $\text{CDCl}_3$ ),  $^{13}\text{C}$  NMR(126 MHz,  $\text{CDCl}_3$ ) and MS spectra of 8,9-dihydrocannabidiol (H<sub>2</sub>CBD)

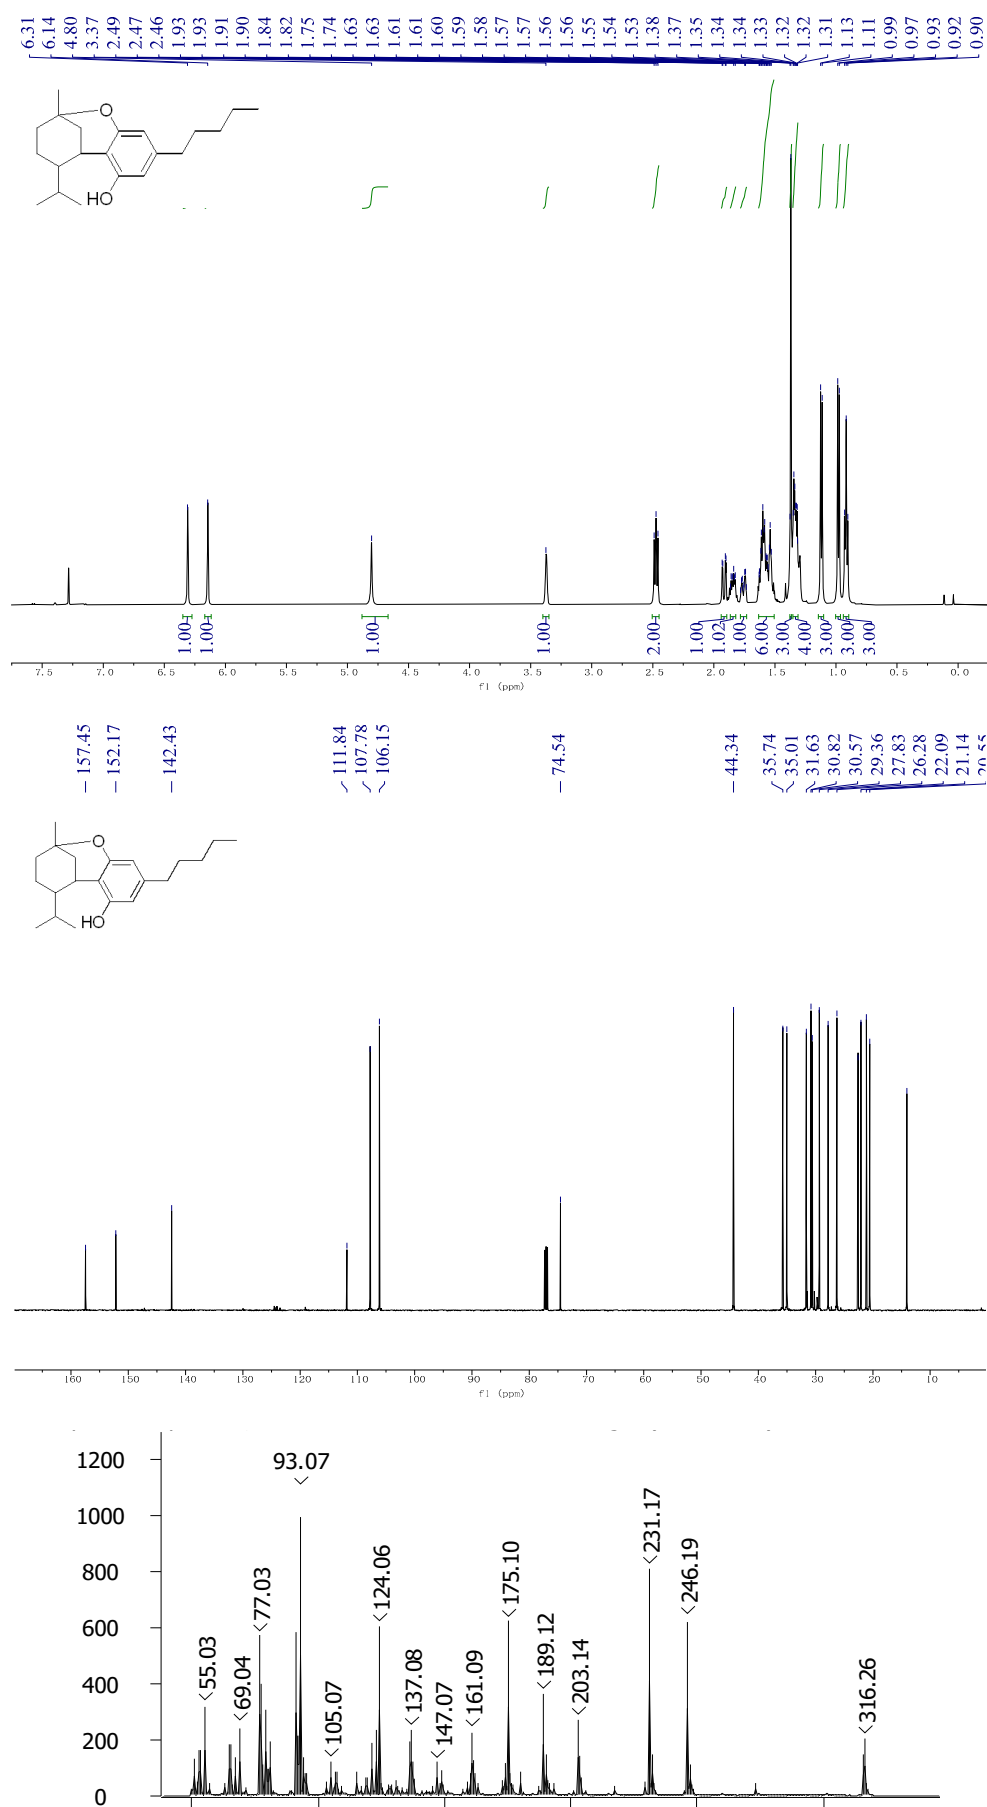

**Figure S2.**  $^1\text{H}$  NMR(400 MHz,  $\text{CDCl}_3$ ),  $^{13}\text{C}$  NMR(126 MHz,  $\text{CDCl}_3$ ) and MS spectra of 6,6,8,9-tetrahydrocannabinol (6,6,8,9-THC)

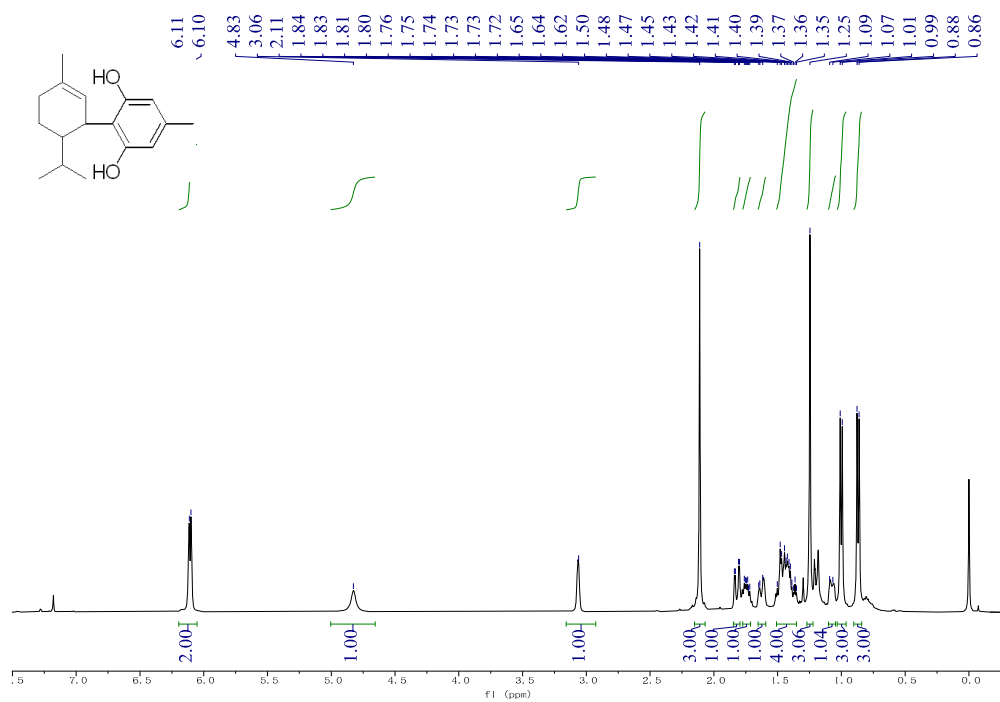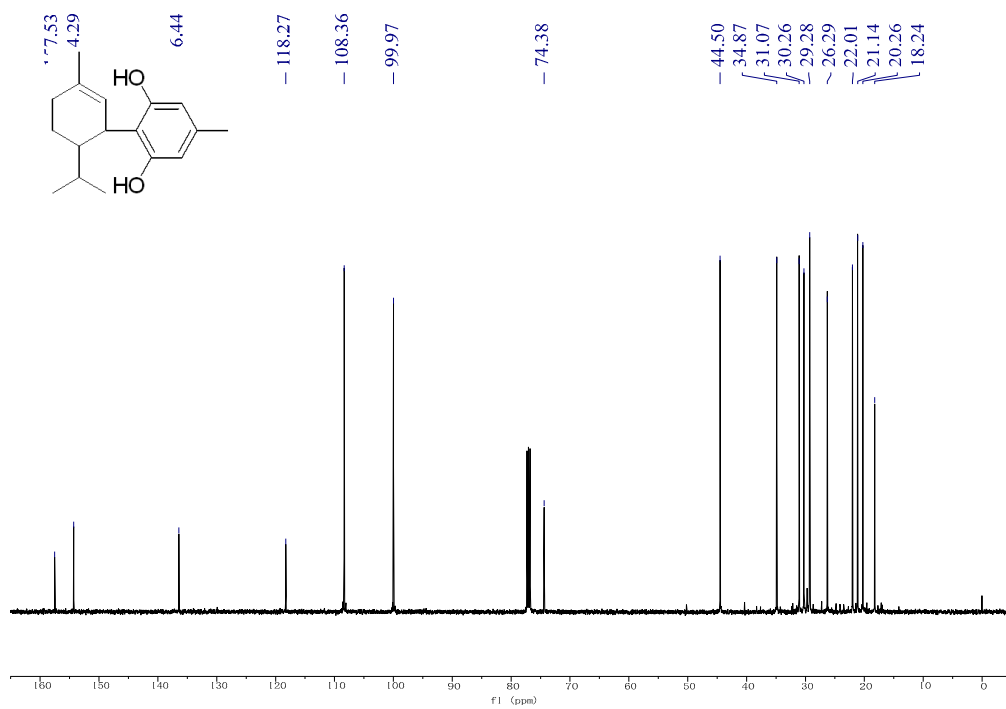

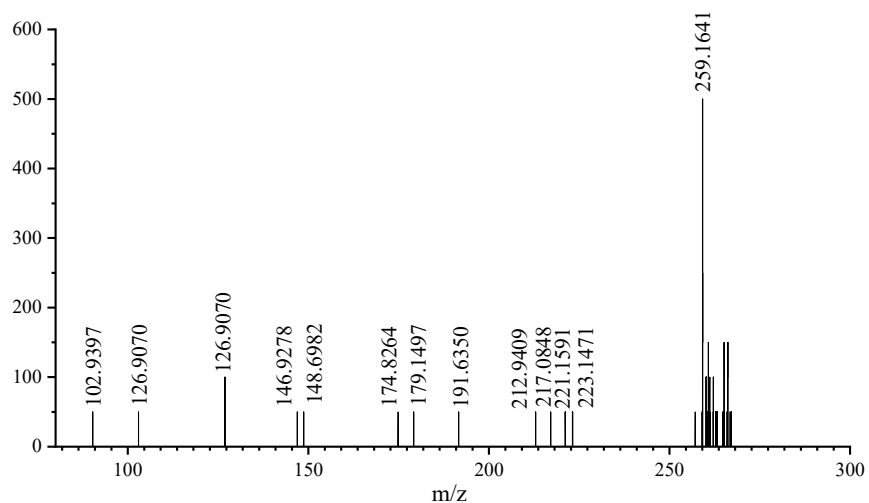

**Figure S3.**  $^1\text{H}$  NMR (400 MHz,  $\text{CDCl}_3$ ) and  $^{13}\text{C}$  NMR (126 MHz,  $\text{CDCl}_3$ ) and MS spectra of 2'-Isopropyl-4,5'-dimethyl-1',2'-dihydro-3',4'-tetrahydro-[1,1'-biphenyl]-2,6-diol (**1a**)

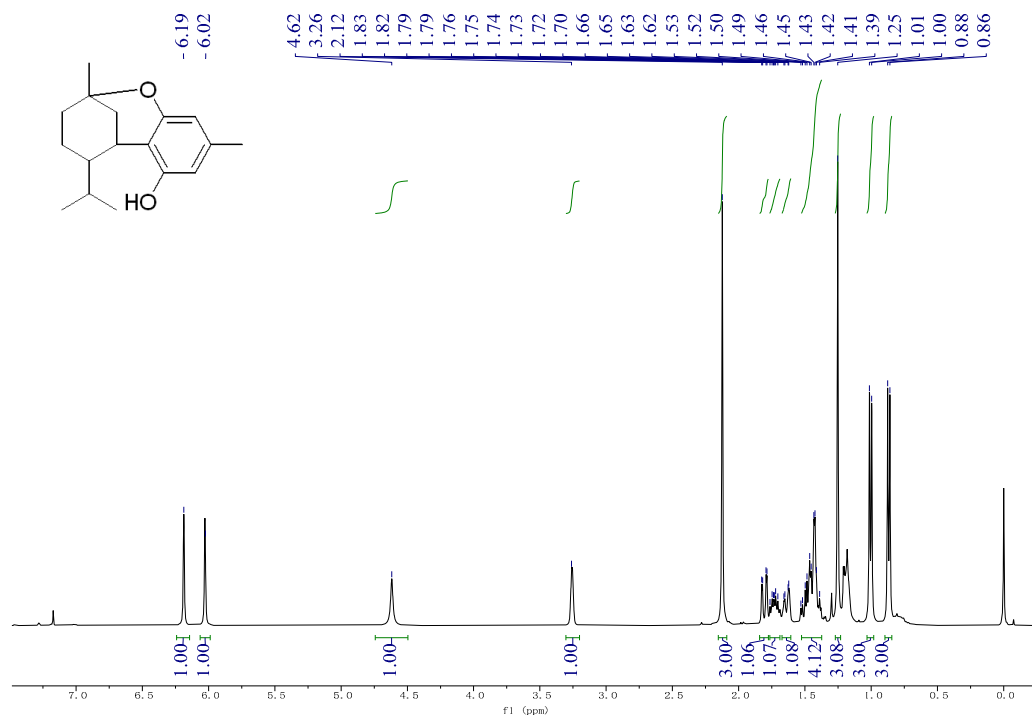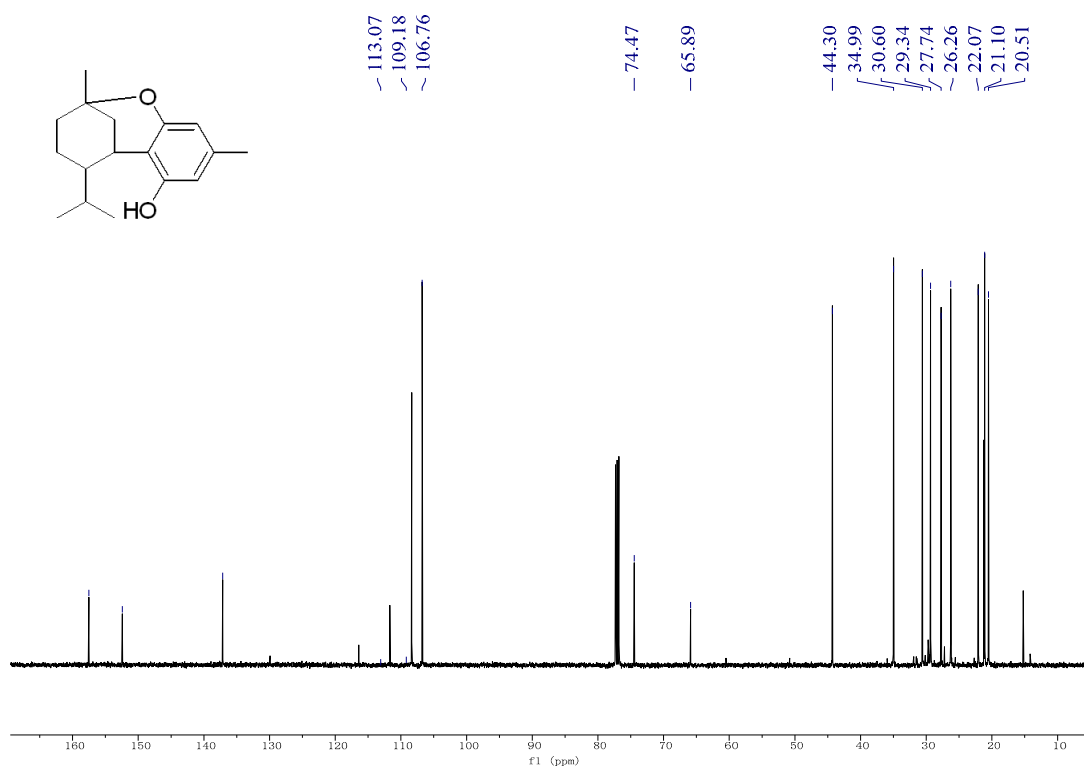

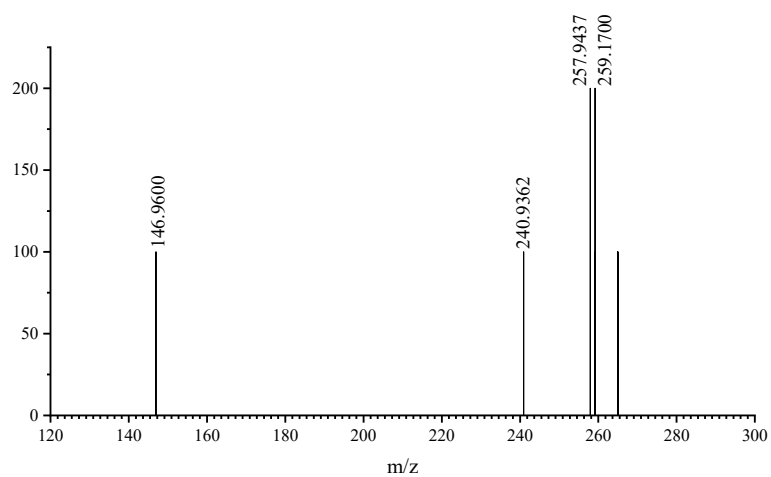

**Figure S4.**  $^1\text{H}$  NMR(400 MHz,  $\text{CDCl}_3$ ) and  $^{13}\text{C}$  NMR(126 MHz,  $\text{CDCl}_3$ ) spectra of 2'-Isopropyl-4,5'-dimethyl-1',2'-dihydro-3',4',6'-hexahydro-1',2-methoxybenzo[b]oxacyclooctatrien-6-ol (**1b**)

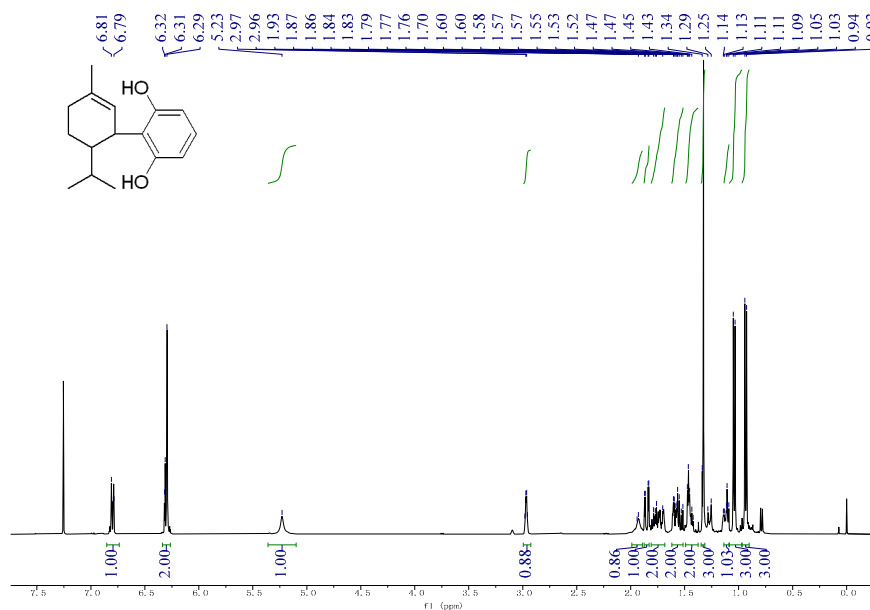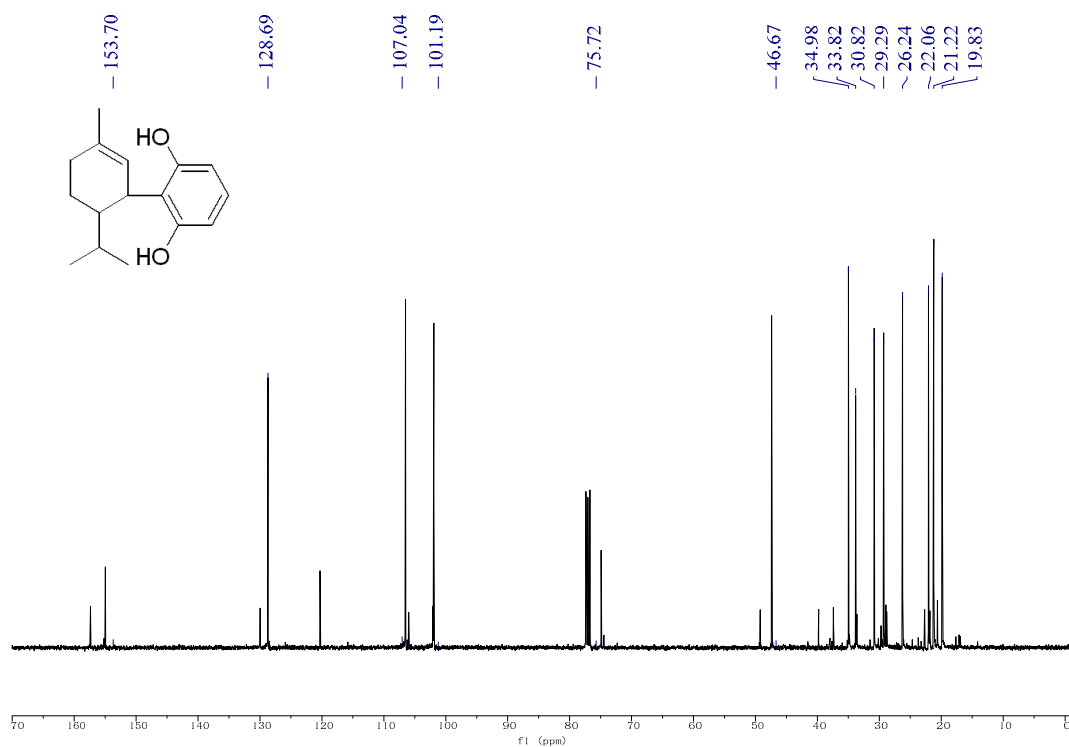



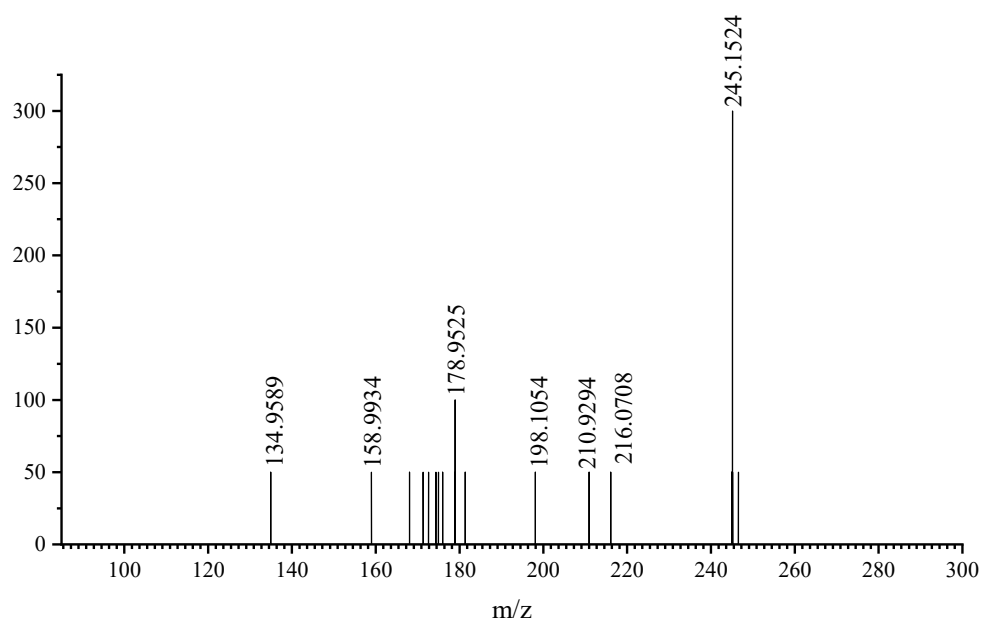

**Figure S5.**  $^1\text{H}$  NMR(400 MHz,  $\text{CDCl}_3$ ) and  $^{13}\text{C}$  NMR(126 MHz,  $\text{CDCl}_3$ ) spectra of 2'-Isopropyl-5'-methyl-1',2'-dihydro-3',4'-tetrahydro-[1,1'-biphenyl]-2,6-diol (**2a**)

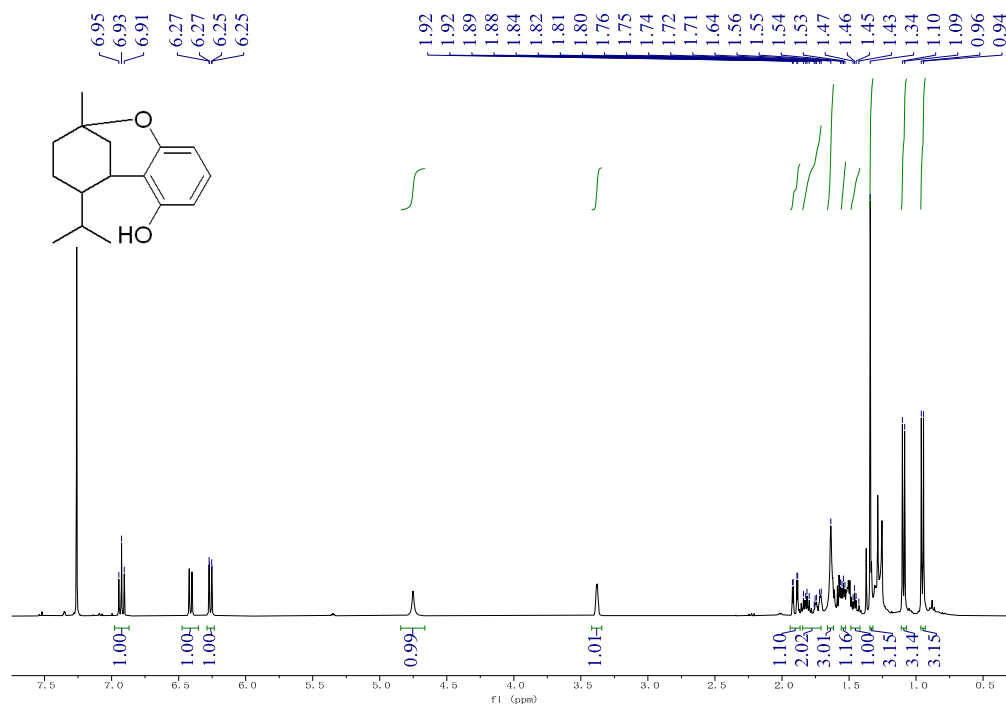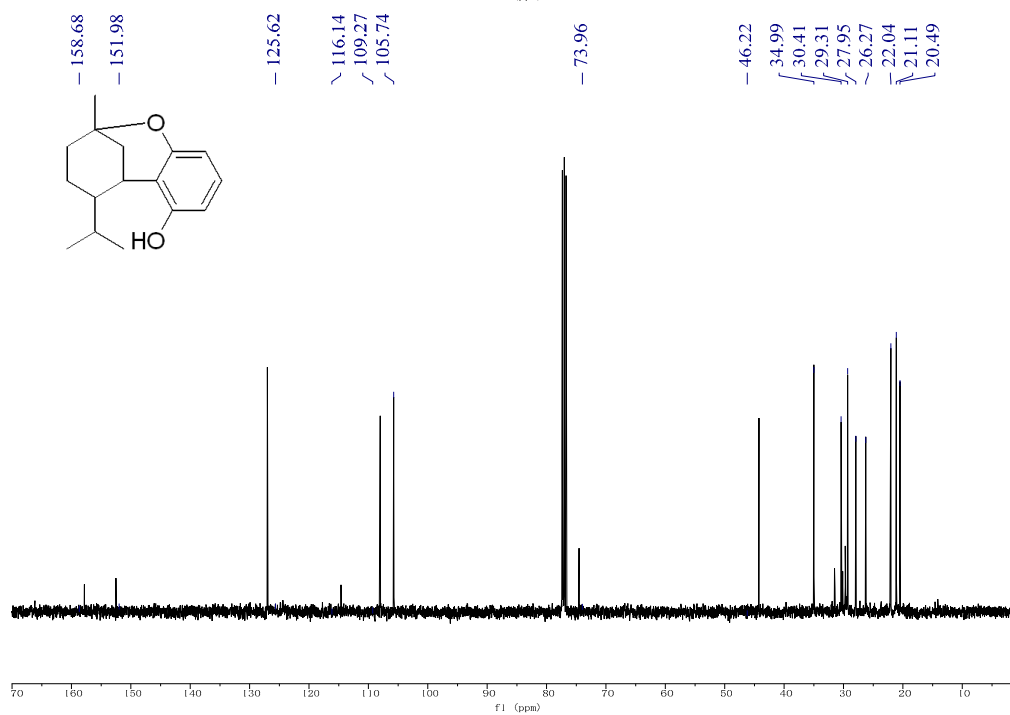

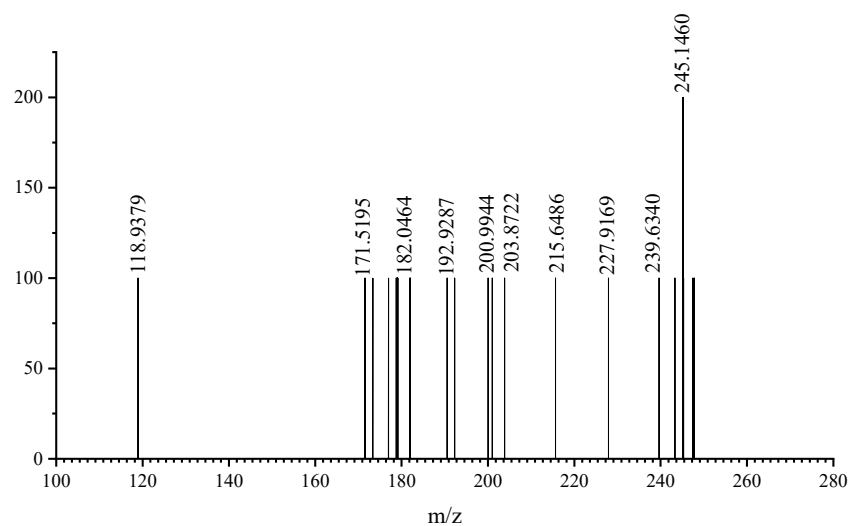

**Figure S6.**  $^1\text{H}$  NMR(400 MHz,  $\text{CDCl}_3$ ) and  $^{13}\text{C}$  NMR(126 MHz,  $\text{CDCl}_3$ ) spectra of 2'-Isopropyl-5'-methyl-1',2'-dihydro-3',4',6'-hexahydro-1',2-methoxybenzo[b]oxacyclooctatrien-6-ol (**2b**)

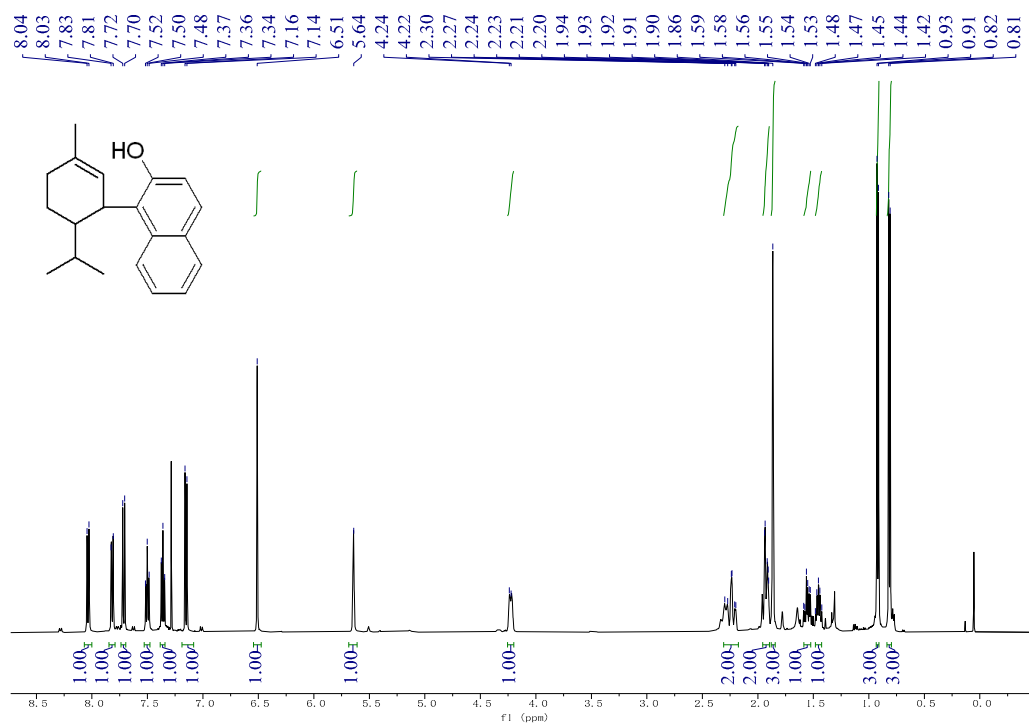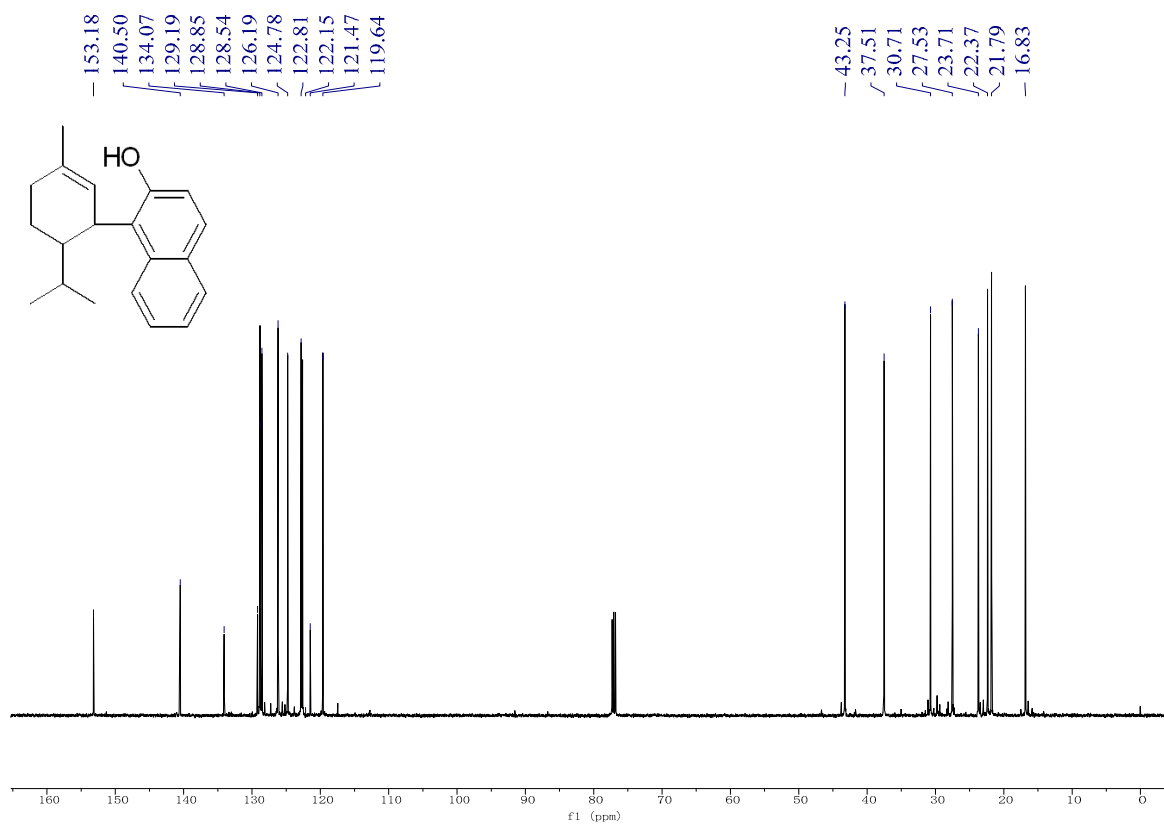

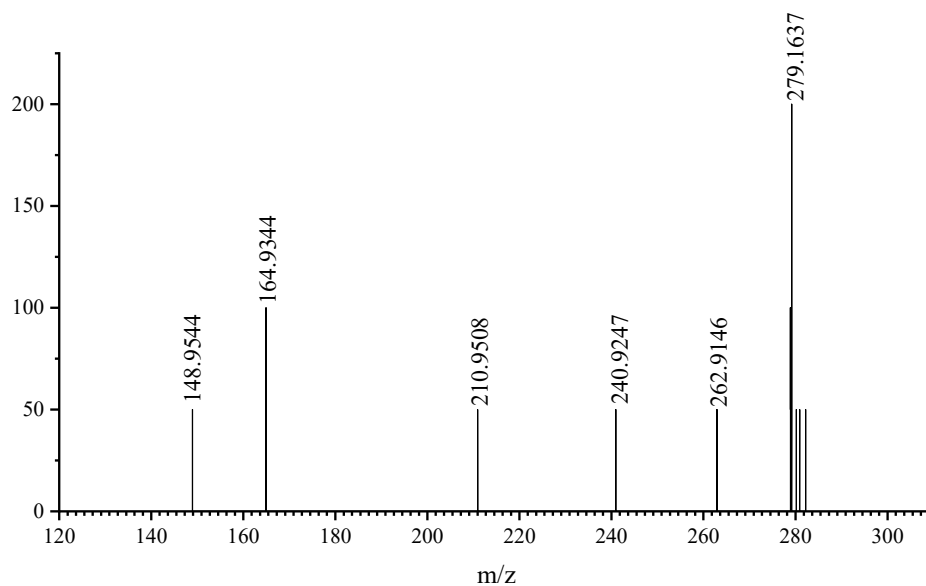

**Figure S7.**  $^1\text{H}$  NMR(400 MHz,  $\text{CDCl}_3$ ) and  $^{13}\text{C}$  NMR(126 MHz,  $\text{CDCl}_3$ ) spectra of 2'-Isopropyl-5'-methyl-1',2'-dihydro-3',4'-tetrahydrocyclohexyl-6-en-1-yl)naphthalene-2-ol (**3a**)

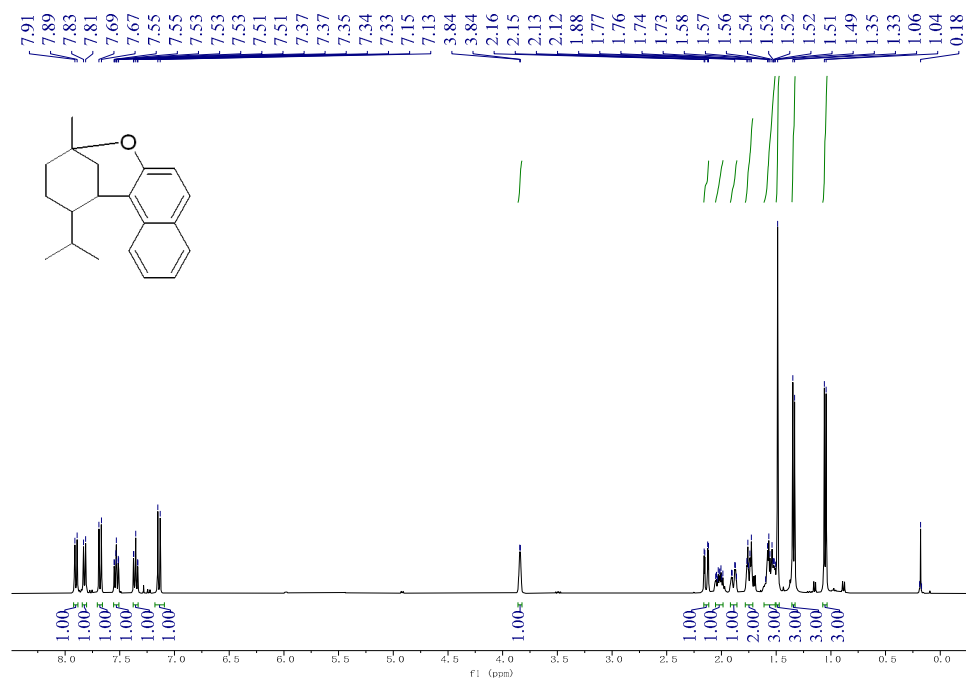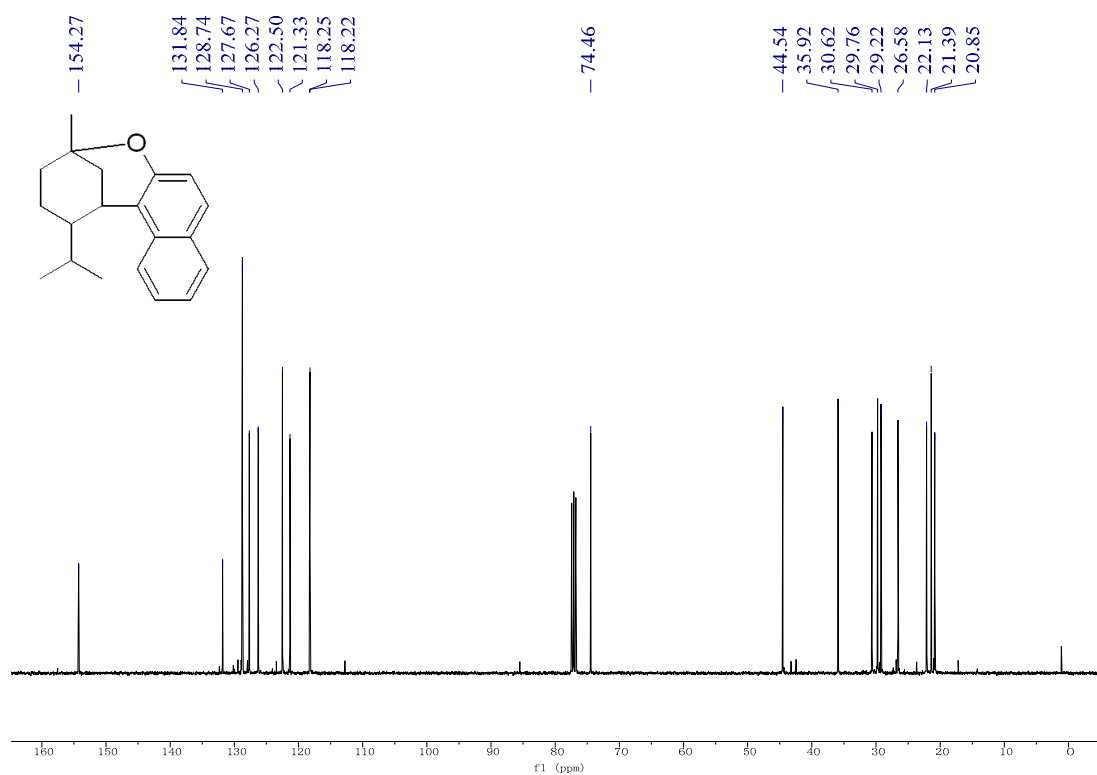

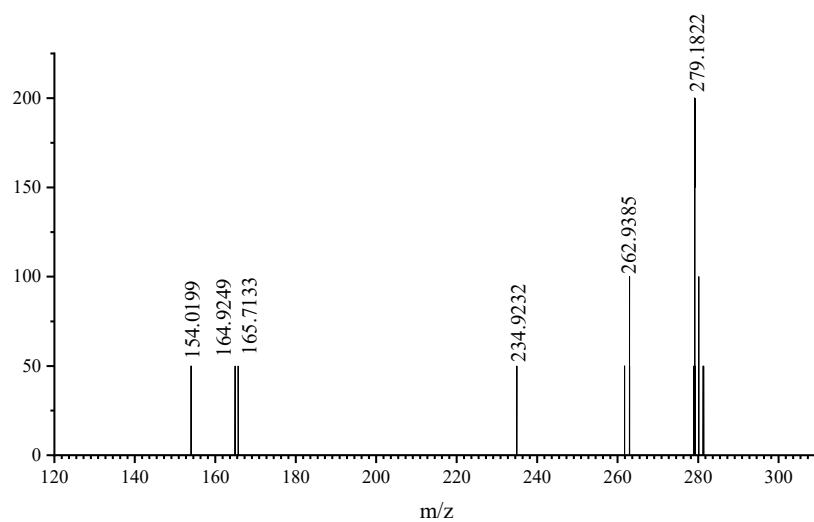

**Figure S8.**  $^1\text{H}$  NMR(400 MHz,  $\text{CDCl}_3$ ) and  $^{13}\text{C}$  NMR(126 MHz,  $\text{CDCl}_3$ ) spectra of 2'-Isopropyl-5'-methyl-1',2'-dihydro-3',4',6'-hexahydro-1,7'-methylnonaphthalene[2,1-b]oxoxine (**3b**)

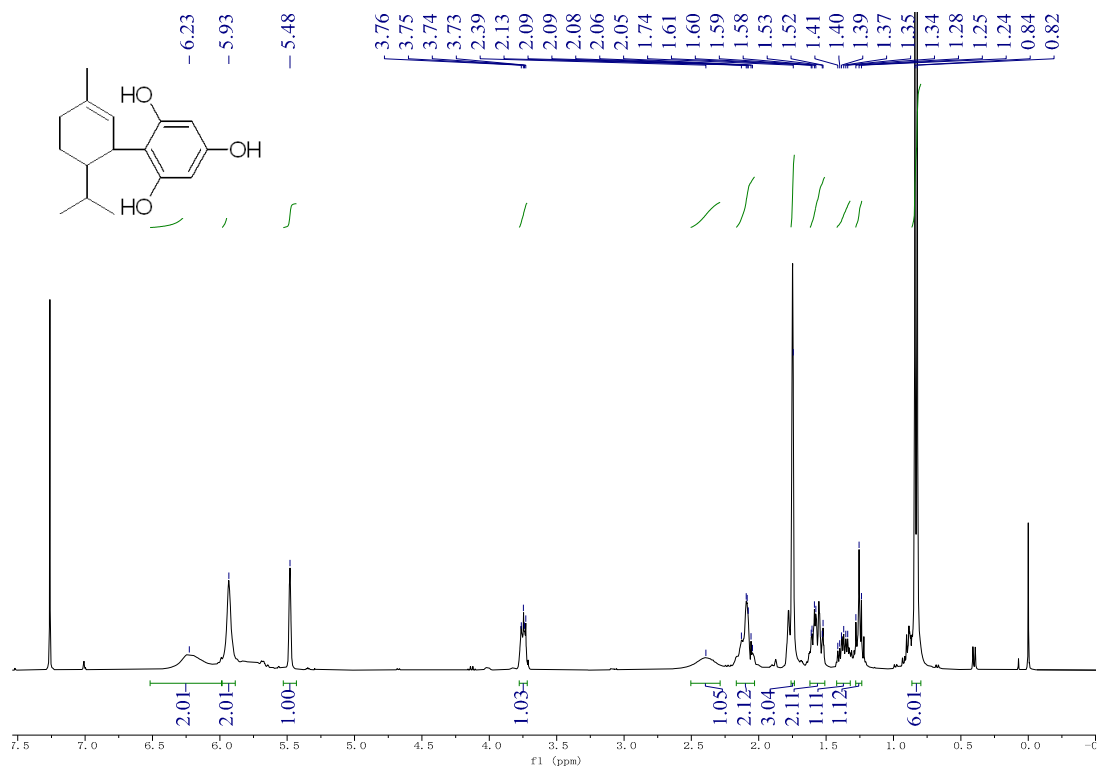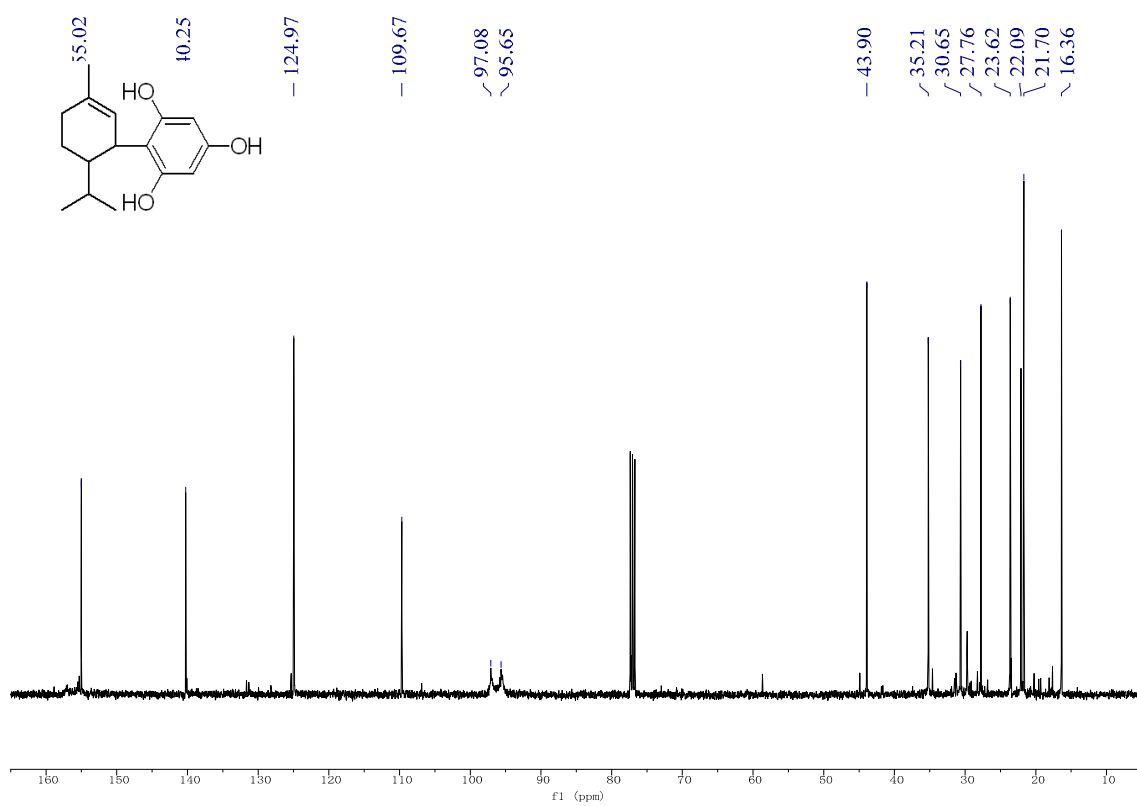



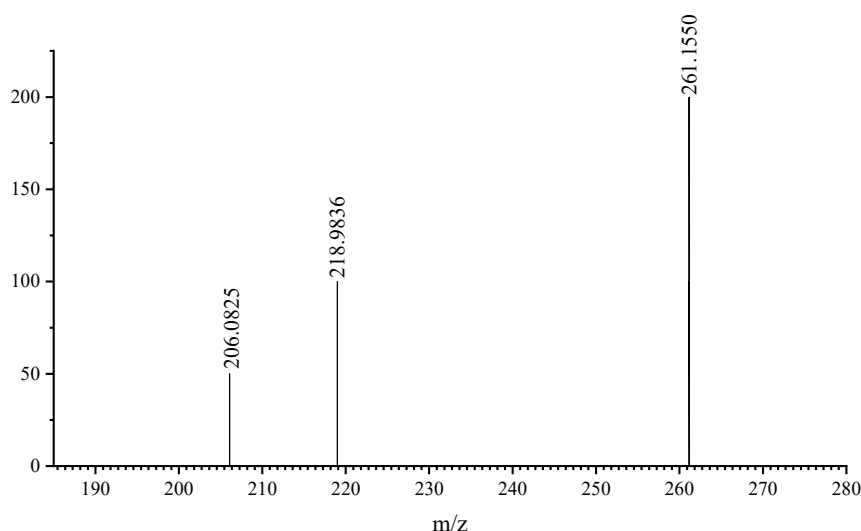

**Figure S9.**  $^1\text{H}$  NMR(400 MHz,  $\text{CDCl}_3$ ) and  $^{13}\text{C}$  NMR(126 MHz,  $\text{CDCl}_3$ ) spectra of 2'-Isopropyl-5'-methyl-1',2'-dihydro-3',4'-tetrahydro-[1,1'-biphenyl]-2,4,6-triol (**4**)

### **H<sub>2</sub>CBD**

**$^1\text{H}$  NMR** (400 MHz,  $\text{CDCl}_3$ )  $\delta$  6.23 (s, 3H, 3-H, 5-H, 2-OH), 5.54 (dt,  $J$  = 2.9, 1.7 Hz, 1H, 6-OH), 4.81 (s, 1H, 6'-H), 3.92~3.77 (m, 1H, 1'-H), 2.52~2.43 (m, 2H, 1''-H), 2.22~2.07 (m, 2H, 4'-H), 1.87~1.76 (m, 4H, 3'-H, 2'-H, 8'-H), 1.72~1.56 (m, 4H, 2''-H, 3''-H), 1.46~1.27 (m, 5H, 4''-H, 5''-H), 0.90 (dt,  $J$  = 15.3, 6.7 Hz, 9H, 7'-methyl, 9'-methyl, 10'-methyl).  **$^{13}\text{C}$  NMR** (126 MHz,  $\text{CDCl}_3$ )  $\delta$  155.5 (C-2, C-6), 142.9 (C-4), 140.0 (C-5'), 124.8 (C-6'), 114.0 (C-1), 109.7 (C-3), 107.4 (C-5), 43.7 (C-1'), 35.6 (C-2'), 35.5 (C-1''), 31.6 (C-2''), 30.7 (C-3'), 27.8 (C-10'), 24.1 (C-7'), 22.6 (C-4''), 22.1 (C-8'), 21.7 (C-3'), 16.4 (C-9'), 14.1 (C-5''). **MS(EI):**  $m/z$  316 [ $\text{M}$ ] $^+$  (15%), 273 [ $\text{M}-\text{C}_3\text{H}_7$ ] $^+$  (7%), 260 [ $\text{M}-\text{C}_4\text{H}_8$ ] $^+$  (6%), 246 [ $\text{M}-\text{C}_5\text{H}_{10}$ ] $^+$  (25%), 231 [ $\text{M}-\text{C}_6\text{H}_{13}$ ] $^+$  (100%), 193 [ $\text{M}-\text{C}_9\text{H}_{15}$ ] $^+$  (10%).

### **6,6,8,9-THC**

**$^1\text{H}$  NMR** (400 MHz,  $\text{CDCl}_3$ )  $\delta$  6.31 (s, 1H, 3-H), 6.14 (s, 1H, 5-H), 4.80 (s, 1H, 6-OH), 3.37 (s, 1H, 1'-H), 2.50~2.45 (m, 2H, 1''-H), 1.94~1.82 (m, 2H, 4'-H), 1.76 (dq,  $J$  = 13.3, 3.2 Hz, 1H, 2'-H), 1.62~1.53 (m, 5H, 3'-H, 6'-H, 8'-H), 1.38~1.29 (m, 9H, 2''-H, 3''-H, 4''-H, 7'-methyl), 1.12 (d,  $J$  = 6.6 Hz, 3H, 9'-methyl), 0.98 (d,  $J$  = 6.5 Hz, 3H, 10'-methyl), 0.92 (t,  $J$  = 6.8 Hz, 3H, 5''-H).  **$^{13}\text{C}$  NMR** (126 MHz,  $\text{CDCl}_3$ )  $\delta$  157.5 (C-2), 152.1 (C-6), 142.4 (C-4), 111.8 (C-1), 107.8 (C-5), 106.2 (C-3), 74.5 (C-5'), 44.3 (C-1'), 35.7 (C-4'), 35.0 (C-3'), 31.6 (C-6'), 30.8 (C-3''), 30.6 (C-4''), 29.4 (C-7'), 27.8 (C-8'), 26.3 (C-2'), 22.6 (C-2''), 22.1 (C-10'), 21.1 (C-9'), 20.6 (C-1'), 14.1 (C-5''). **MS(EI):**  $m/z$  316 [ $\text{M}$ ] $^+$  (15%), 246 [ $\text{M}-\text{C}_5\text{H}_{10}$ ] $^+$  (25%), 231 [ $\text{M}-\text{C}_6\text{H}_{13}$ ] $^+$  (100%), 203 [ $\text{M}-\text{C}_8\text{H}_{17}$ ] $^+$  (10%), 189 [ $\text{M}-\text{C}_9\text{H}_{19}$ ] $^+$  (10%).

### **1a: 2'-Isopropyl-4,5'-dimethyl-1',2'-dihydro-3',4'-tetrahydro-[1,1'-biphenyl]-2,6-diol**

**$^1\text{H}$  NMR** (400 MHz,  $\text{CDCl}_3$ )  $\delta$  6.11 (d,  $J$  = 5.1 Hz, 2H, 3-H, 5-H), 4.83 (s, 1H, 6'-H), 3.06 (s, 1H, 1'-H), 2.11 (s, 3H, 1''-H), 1.82 (dd,  $J$  = 13.2, 2.8 Hz, 1H, 2'-H), 1.77~1.71 (m, 1H), 1.65~1.59 (m, 1H), 1.51~1.35 (m, 4H, 4'-H, 3'-H), 1.25 (s, 3H, 7'-methyl), 1.08 (d,  $J$  = 10.2 Hz, 1H, 8'-H), 1.00 (d,  $J$  = 6.6 Hz, 3H, 9'-methyl), 0.87 (d,  $J$  = 6.5 Hz, 3H, 10'-methyl).  **$^{13}\text{C}$  NMR** (126 MHz,  $\text{CDCl}_3$ )  $\delta$  157.53 (C-4), 154.29 (C-2, C-6), 136.44 (C-5'), 118.27 (C-6'), 108.36 (C-1), 99.97 (C-3, C-5), 74.38 (C-1''), 44.50 (C-1'), 34.87 (C-2'), 30.26 (C-4'), 29.28, 26.29 (C-8'), 22.01 (C-3'), 21.14 (C-7'), 18.24 (C-9', C-10'). **HRMS (ESI-TOF)**  $m/z$  260.1641 [ $\text{M}-\text{H}$ ] $^-$  (calcd for  $\text{C}_{17}\text{H}_{24}\text{O}_2$ , 260.1776).

### **1b: 2'-Isopropyl-4,5'-dimethyl-1',2'-dihydro-3',4',6'-hexahydro-1',2-methoxybenzo[b]oxacyclooctatrien-6-ol**

**$^1\text{H}$  NMR** (400 MHz,  $\text{CDCl}_3$ )  $\delta$  6.19 (s, 1H, 3-H), 6.02 (s, 1H, 5-H), 4.62 (s, 1H, 6-OH), 3.26 (s, 1H, 1'-H), 2.12 (s, 3H, 1''-H), 1.81 (dd,  $J$  = 13.2, 2.7 Hz, 1H, 2'-H), 1.73 (dt,  $J$  = 10.6, 6.5 Hz, 1H), 1.64 (dd,  $J$  = 12.1, 2.6 Hz, 1H, 8'-H), 1.53~1.37 (m, 4H, 4'-H, 3'-H), 1.25 (s, 3H, 7'-methyl), 1.21~1.16 (m, 2H, 6'-H), 1.00 (d,  $J$  = 6.6 Hz, 3H, 9'-methyl), 0.87 (d,  $J$  = 6.5 Hz, 3H, 10'-methyl).  **$^{13}\text{C}$  NMR** (126 MHz,  $\text{CDCl}_3$ )  $\delta$  157.51 (C-1), 152.43 (C-2), 137.13 (C-4), 113.07 (C-6), 109.18 (C-3), 106.76 (C-5), 74.47 (C-1''), 65.89 (C-1'), 44.30 (C-4'), 34.99 (C-6'), 30.60 (C-8'), 29.34

(C-2'), 27.74 (C-7'), 26.26 (C-5'), 22.07 (C-3'), 20.51 (C-9', C-10'). **HRMS** (ESI-TOF)  $m/z$  260.1700 [M - H]<sup>-</sup> (calcd for C<sub>17</sub>H<sub>24</sub>O<sub>2</sub>, 260.1810).

**2a: 2'-Isopropyl-5'-methyl-1',2'-dihydro-3',4'-tetrahydro-[1,1'-biphenyl]-2,6-diol**

**<sup>1</sup>H NMR** (400 MHz, CDCl<sub>3</sub>) δ 6.80 (d,  $J$  = 9.6 Hz, 1H, 4-H), 6.34~6.26 (m, 2H, 3-H, 5-H), 5.23 (s, 1H, 6'-H), 2.97 (q,  $J$  = 3.1 Hz, 1H, 1'-H), 1.93 (br,  $J$  = 4.4 Hz, 1H, 2-OH), 1.85 (dd,  $J$  = 13.2, 2.6 Hz, 1H, 2'-H), 1.77 (d,  $J$  = 3.7 Hz, 1H, 8'-H), 1.62~1.51 (m, 2H, 4'-H), 1.49~1.38 (m, 2H, 3'-H), 1.34 (s, 3H, 7'-methyl), 1.14~1.09 (m, 1H, 6-OH), 1.04 (d,  $J$  = 6.6 Hz, 3H, 9'-methyl), 0.93 (d,  $J$  = 6.5 Hz, 3H, 10'-methyl). **<sup>13</sup>C NMR** (126 MHz, CDCl<sub>3</sub>) δ 153.70 (C-2, C-6), 128.69 (C-4), 120.31 (C-1), 107.04 (C-3, C-5), 101.19 (C-6'), 75.72 (C-5'), 46.67 (C-1'), 34.98 (C-2'), 30.82 (C-4'), 26.24 (C-8'), 22.06 (C-3'), 21.22 (C-7'), 19.83 (C-9', C-10'). **HRMS** (ESI-TOF)  $m/z$  246.1524 [M - H]<sup>-</sup> (calcd for C<sub>17</sub>H<sub>24</sub>O<sub>2</sub>, 246.1620).

**2b: 2'-Isopropyl-5'-methyl-1',2'-dihydro-3',4',6'-hexahydro-1',2-methoxybenzo[b]oxacyclooctatrien-6-ol**

**<sup>1</sup>H NMR** (400 MHz, CDCl<sub>3</sub>) δ 6.93 (t,  $J$  = 8.1 Hz, 1H, 4-H), 6.41 (dd,  $J$  = 8.3, 1.0 Hz, 1H, 5-H), 6.26 (dd,  $J$  = 7.9, 1.0 Hz, 1H, 3-H), 4.75 (s, 1H, 6-OH), 3.38 (q,  $J$  = 3.1 Hz, 1H, 1'-H), 1.90 (dd,  $J$  = 13.3, 2.7 Hz, 1H, 2'-H), 1.85~1.71 (m, 2H, 4'-H), 1.64 (s, 3H, 8'-H, 3'-H), 1.54 (d,  $J$  = 4.3 Hz, 2H, 6'-H), 1.34 (s, 3H, 7'-methyl), 1.09 (d,  $J$  = 6.6 Hz, 3H, 9'-methyl), 0.95 (d,  $J$  = 6.5 Hz, 3H, 10'-methyl). **<sup>13</sup>C NMR** (126 MHz, CDCl<sub>3</sub>) δ 158.68 (C-1), 151.98 (C-2), 125.62 (C-4), 116.14 (C-6), 109.27 (C-3), 105.74 (C-5), 73.96 (C-5'), 46.22 (C-1'), 34.99 (C-2'), 30.41 (C-4'), 29.31 (C-6'), 26.27 (C-8'), 22.04 (C-3'), 21.11 (C-7'), 20.49 (C-9', C-10'). **HRMS** (ESI-TOF)  $m/z$  246.1460 [M - H]<sup>-</sup> (calcd for C<sub>17</sub>H<sub>24</sub>O<sub>2</sub>, 246.1653).

**3a: 2'-Isopropyl-5'-methyl-1',2'-dihydro-3',4'-tetrahydrocyclohexyl-6-en-1-yl)naphthalene-2-ol**

**<sup>1</sup>H NMR** (400 MHz, CDCl<sub>3</sub>) δ 8.04 (d,  $J$  = 8.7 Hz, 1H, 9-H), 7.82 (d,  $J$  = 9.6 Hz, 1H, 6-H), 7.71 (d,  $J$  = 8.8 Hz, 1H, 4-H), 7.50 (t,  $J$  = 8.5 Hz, 1H, 7-H), 7.36 (t,  $J$  = 7.5 Hz, 1H, 8-H), 7.15 (d,  $J$  = 8.8 Hz, 1H, 3-H), 6.51 (s, 1H, 2-OH), 5.64 (s, 1H, 6'-H), 4.23 (d,  $J$  = 7.5 Hz, 1H, 1'-H), 2.31~2.17 (m, 2H, 4'-H), 1.92 (dd,  $J$  = 16.1, 2.5 Hz, 2H, 3'-H), 1.86 (s, 3H, 7'-methyl), 1.55 (dt,  $J$  = 12.0, 6.3 Hz, 1H, 2'-H), 1.48~1.42 (m, 1H, 8'-H), 0.92 (d,  $J$  = 6.9 Hz, 3H, 9'-methyl), 0.81 (d,  $J$  = 7.0 Hz, 3H, 10'-methyl). **<sup>13</sup>C NMR** (126 MHz, CDCl<sub>3</sub>) δ 238.47 (C-2), 222.35 (C-10), 153.18 (C-5), 140.50 (C-4), 134.07 (C-8), 129.19 (C-1), 128.85 (C-9), 126.19 (C-7), 124.78 (C-3), 122.81 (C-6), 122.15 (C-6'), 121.47 (C-5'), 119.64 (C-1'), 43.25 (C-2'), 37.51 (C-4'), 30.71 (C-8'), 27.53 (C-3'), 23.71 (C-7'), 22.37 (C-9'), 21.79 (C-10'). **HRMS** (ESI-TOF)  $m/z$  280.1637 [M - H]<sup>-</sup> (calcd for C<sub>17</sub>H<sub>24</sub>O<sub>2</sub>, 280.1827).

**3b: 2'-Isopropyl-5'-methyl-1',2'-dihydro-3',4',6'-hexahydro-1,7'-methylnonaphthalene[2,1-b]oxoxine**

**<sup>1</sup>H NMR** (400 MHz, CDCl<sub>3</sub>) δ 7.90 (d,  $J$  = 8.5 Hz, 1H, 9-H), 7.82 (d,  $J$  = 8.0 Hz, 1H, 6-H), 7.68 (d,  $J$  = 8.9 Hz, 1H, 4-H), 7.53 (ddd,  $J$  = 8.4, 6.9, 1.3 Hz, 1H, 7-H), 7.38~7.33 (m, 1H, 8-H), 7.14 (d,  $J$  = 8.9 Hz, 1H, 3-H), 3.86~3.82 (m, 1H, 1'-H), 2.14~2.02 (ddt,  $J$  = 13.1, 6.6, 3.4 Hz, 1H, 4'-H), 1.92~1.86 (m, 1H, 2'-H), 1.78~1.71 (m, 2H, 3'-H), 1.61~1.51 (m, 3H, 6'-H, 8'-H), 1.49 (s, 3H, 7'-methyl), 1.34 (d,  $J$  = 6.6 Hz, 3H, 9'-methyl), 1.05 (d,  $J$  = 6.6 Hz, 3H, 10'-methyl). **<sup>13</sup>C NMR** (126 MHz, CDCl<sub>3</sub>) δ 154.27 (C-2), 131.84 (C-10), 128.74 (C-5), 127.67 (C-4), 126.27 (C-8), 122.50 (C-1), 121.33 (C-9), 118.25 (C-7), 118.22 (C-3), 112.78 (C-6), 74.46 (C-1'), 44.54 (C-2'), 35.92 (C-4'), 30.62 (C-8'), 29.76 (C-3'), 29.22 (C-5'), 26.58 (C-6'), 22.13 (C-7'), 21.39 (C-9'), 20.85 (C-10'). **HRMS** (ESI-TOF)  $m/z$  280.1822 [M - H]<sup>-</sup> (calcd for C<sub>17</sub>H<sub>24</sub>O<sub>2</sub>, 280.1861).

**4: 2'-Isopropyl-5'-methyl-1',2'-dihydro-3',4'-tetrahydro-[1,1'-biphenyl]-2,4,6-triol**

**<sup>1</sup>H NMR** (400 MHz, CDCl<sub>3</sub>) δ: 6.23 (s, 2H, 3-H, 5-H), 5.93 (s, 2H, 2-OH, 6-OH), 5.48 (s, 1H, 6'-H), 3.74 (dd,  $J$  = 8.1, 5.2 Hz, 1H, 1'-H), 2.39 (br s, 1H, 4-OH), 2.17~2.03 (m, 2H, 4'-H), 1.74 (s, 3H, 7'-methyl), 1.62~1.51 (m, 2H, 3'-H), 1.42~1.32 (m, 1H, 2'-H), 1.28~1.24 (m, 1H, 8'-H), 0.83 (d,  $J$  = 6.8 Hz, 6H, 9'-methyl, 10'-methyl). **<sup>13</sup>C NMR** (126 MHz, CDCl<sub>3</sub>) δ: 155.02 (C-4), 140.25 (C-2, C-6), 124.97 (C-5'), 109.67 (C-6'), 97.08 (C-1), 95.65 (C-3, C-5), 43.90 (C-2'), 35.21 (C-1'), 30.65 (C-4'), 27.76 (C-8'), 23.62 (C-3'), 22.09 (C-7'), 21.70 (C-9', C-10'). **HRMS** (ESI-TOF)  $m/z$  262.1550 [M - H]<sup>-</sup> (calcd for C<sub>17</sub>H<sub>24</sub>O<sub>2</sub>, 262.1569).
